# Supplementary material for: Fabrication of water dispersible and biocompatible AIE-active fluorescent polymeric nanoparticles through a “one-pot” Mannich reaction
Source: Royal Society of Chemistry journal article supplement (doi:10.1039/c7py00884h), 2017-01-01
Supplement: c7py00884h1.pdf [file c7py00884h1.pdf]

Fabrication of water dispersible and biocompatible AIE-active fluorescent polymeric nanoparticles through a “one-pot” Mannich reaction

Guangjian Zeng<sup>a,#</sup>, Meiyong Liu<sup>a,#</sup>, Ruming Jiang<sup>a</sup>, Qiang Huang<sup>a</sup>, Long Huang<sup>a</sup>, Qing Wan<sup>a</sup>, Yanfeng Dai<sup>a</sup>, Yuanqing Wen<sup>a,\*</sup>, Xiaoyong Zhang<sup>a,\*</sup>, Yen Wei<sup>b,\*</sup>

<sup>a</sup> Department of Chemistry, Nanchang University, 999 Xuefu Avenue, Nanchang 330031, China.

<sup>b</sup> Department of Chemistry and the Tsinghua Center for Frontier Polymer Research, Tsinghua University, Beijing, 100084, P. R. China.

## Results

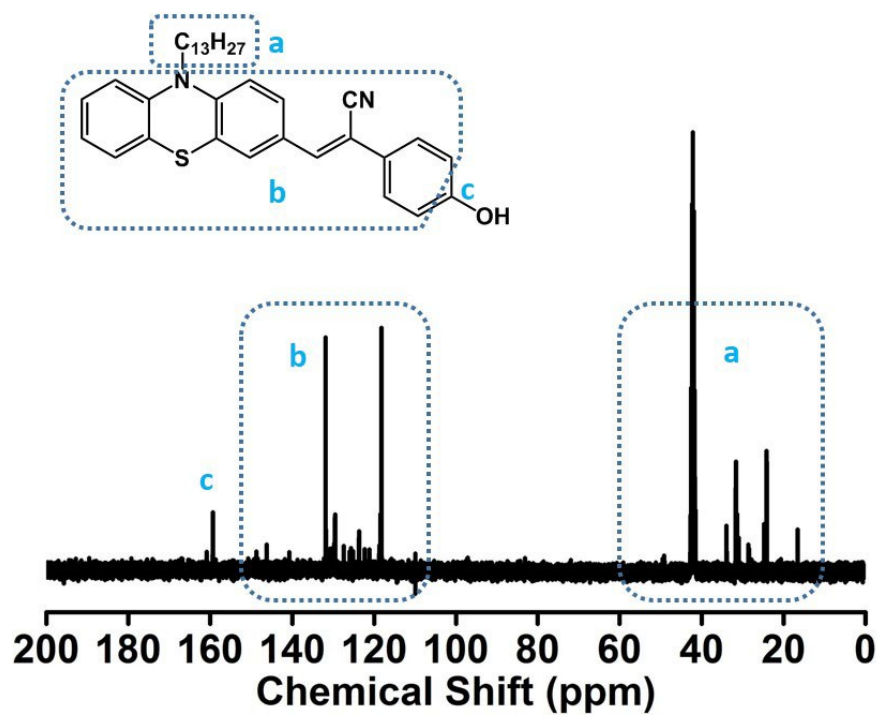

Fig. S1  $^{13}\text{C}$  NMR spectra of PhE-OH in DMSO- $d_6$ .

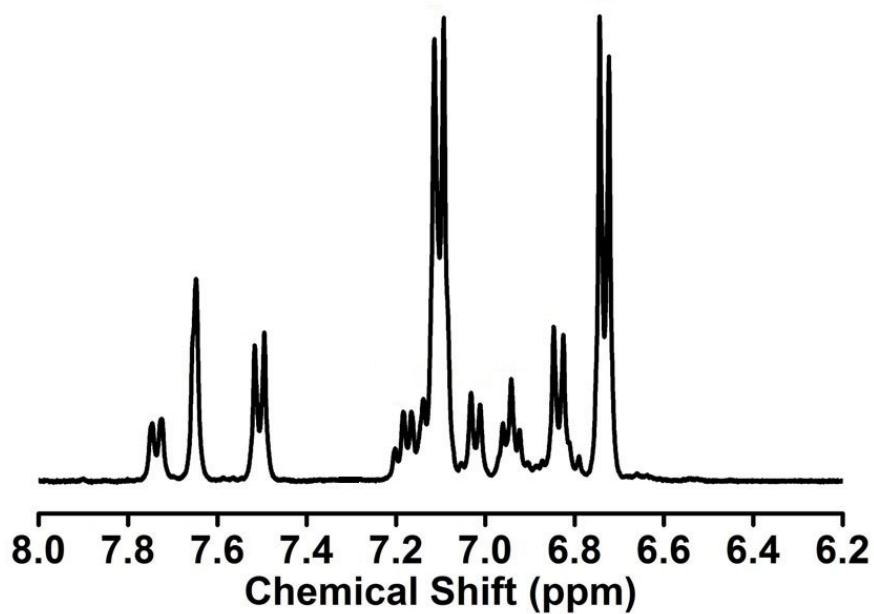

Fig. S2  $^1\text{H}$  NMR spectra of PhE-OH in DMSO- $d_6$  between 6.2-8.0 ppm.

$^1\text{H}$  NMR (400 MHz, DMSO- $d_6$ )  $\delta$  (ppm): 0.81 (t, 3H), 1.10-1.28 (m, 18H), 1.28-1.40 (m, 2H), 1.60-1.71 (quint, 2H), 3.84 (t, 2H), 6.74 (d, 2H), 6.85 (d, 1H), 6.94 (t, 1H), 7.04 (d, 1H), 7.08-7.11 (d, 2H), 7.18 (t, 1H), 7.31 (s, 1H), 7.38-7.51 (d, 1H), 7.64 (s, 1H), 7.75(d, 1H), 9.46 (s, 1H).

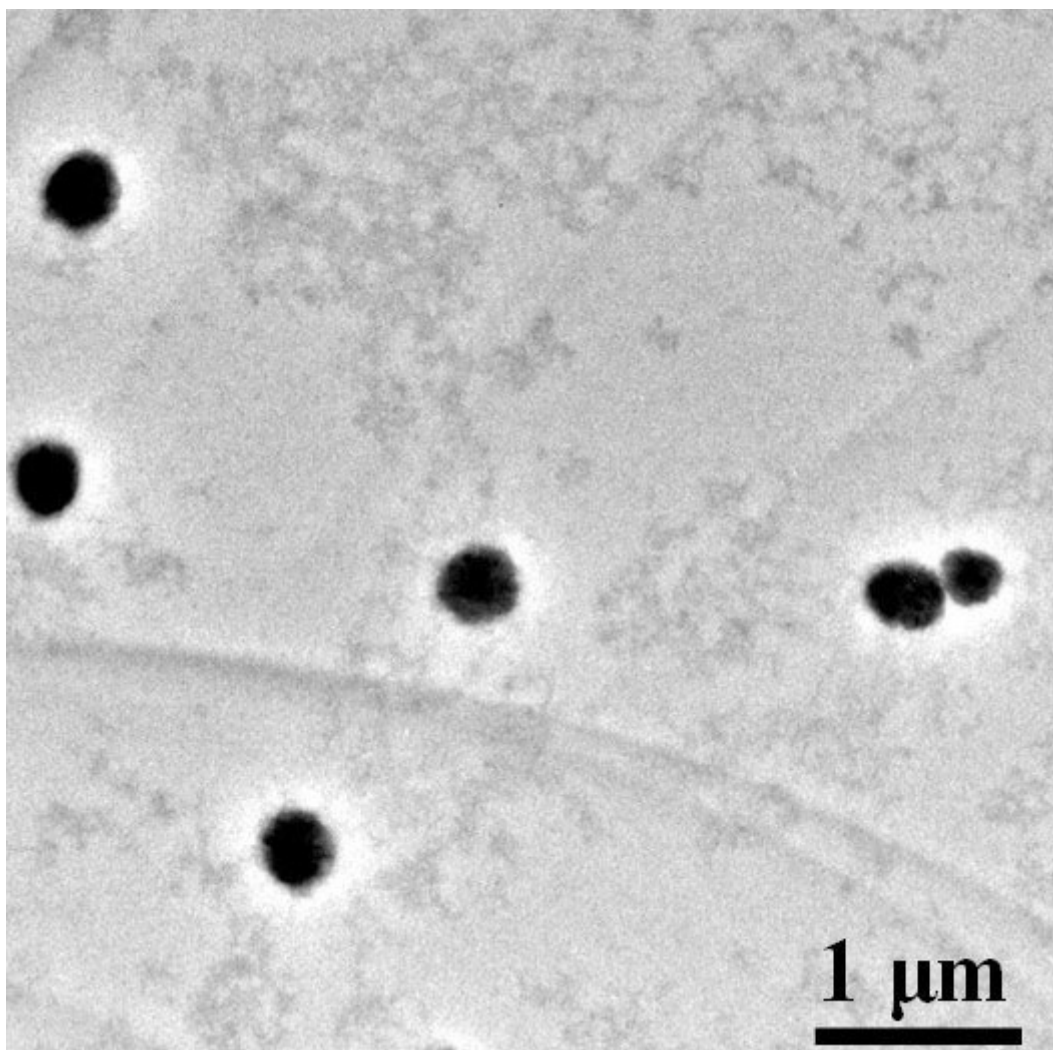

Fig. S3 TEM image of PEG-PhE FPNs. The scale bar = 1 μm.

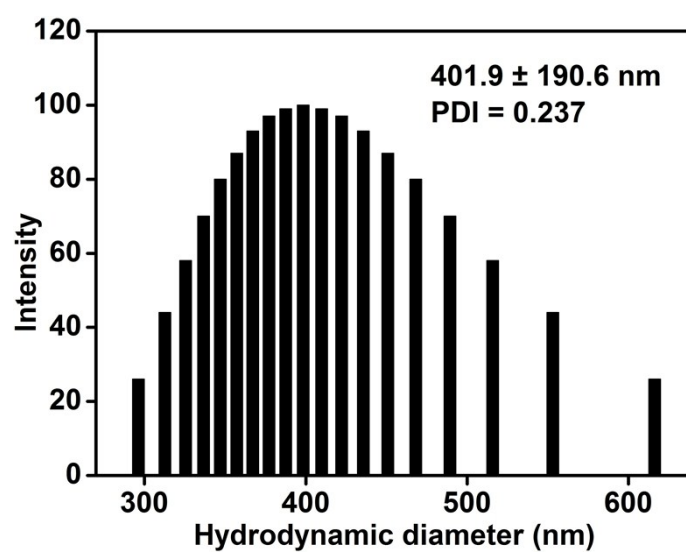

Fig. S4 Hydrodynamic size distribution of PEG-PhE FPNs in water based on DLS.

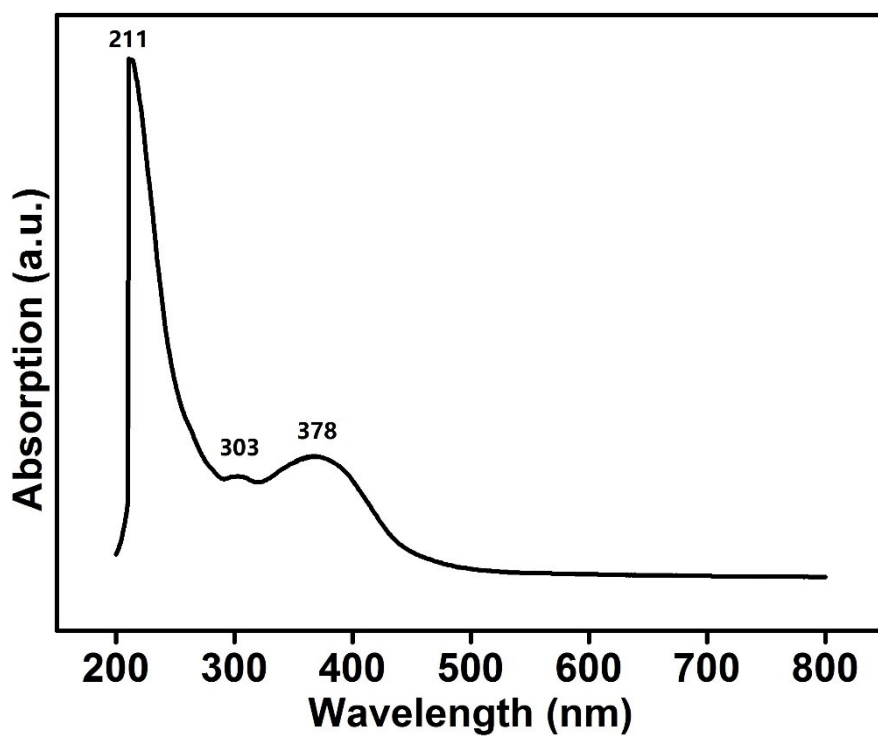

Fig. S5 The UV-Vis absorption spectrum of PEG-PhE dissolved in aqueous solution.

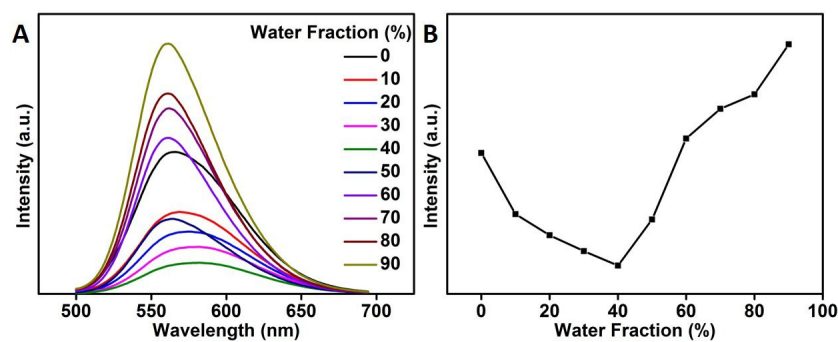

Fig. S6 The AIE properties of PhE-OH. (A) the fluorescent spectra of PhE-OH in the mixture solvents with different fractions of water, (B) the fluorescent intensities of PhE-OH as function with different fractions of water.

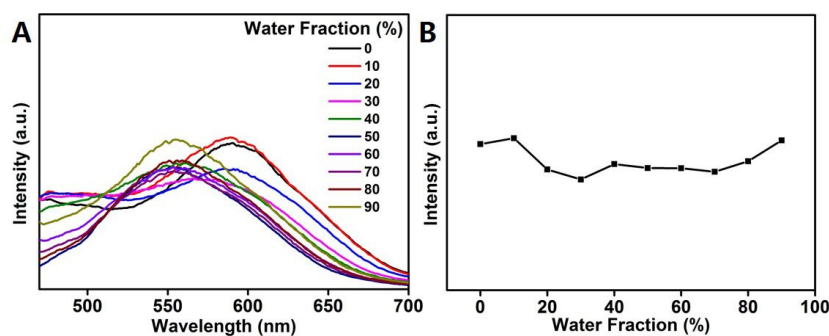

Fig. S7 The AIE properties of PEG-PhE FPNs. (A) the fluorescent spectra of PhE-OH in the mixture

solvents with different fractions of water, (B) the fluorescent intensities of PhE-OH as function with different fractions of water.

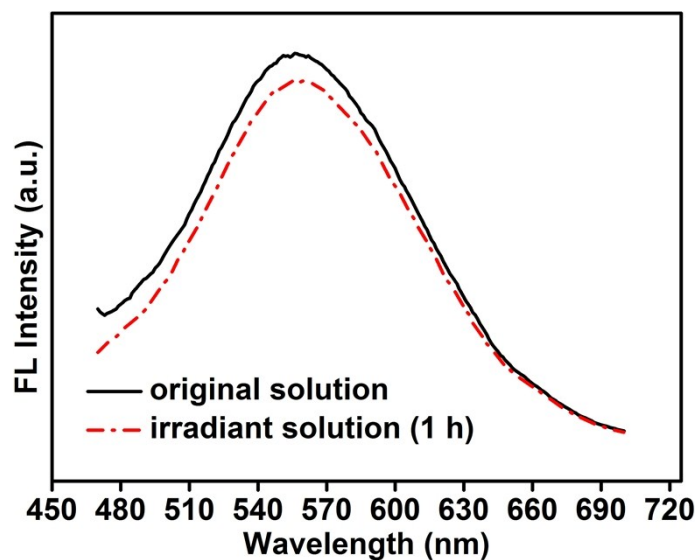

**Fig. S8** Photostability evaluation of PEG-PhE FPNs investigated by fluorescent spectroscopy. The water suspension of PEG-PhE FPNs was irradiated by UV lamp at 365 nm for 1 h.

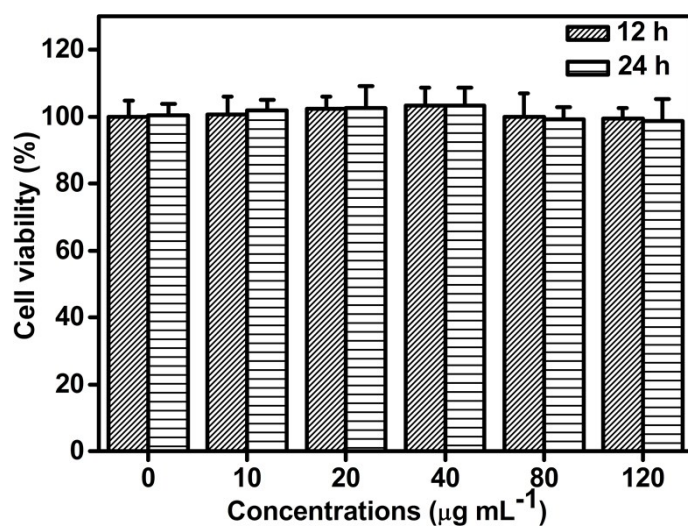

**Fig. S9** Cell viability of PEG-PhE FPNs for 12 h and 24 h with different concentrations (0-120  $\mu\text{g mL}^{-1}$ ) for incubating.
